# Supplementary material for: Applicability of optimal functional tuning in density functional calculations of ionization potentials and electron affinities of adenine–thymine nucleobase pairs and clusters
Source: Royal Society of Chemistry journal article supplement (doi:10.1039/c4cp05470a), 2015-01-01
Supplement: c4cp05470a1.pdf [file c4cp05470a1.pdf]

# † Supporting Information for

Applicability of Optimal Functional Tuning in Density  
Functional Calculations of Ionization Potentials and Electron  
Affinities of Adenine-Thymine Nucleobase Pairs and Clusters

Haitao Sun\*, Shian Zhang and Zhenrong Sun\*

*State Key Laboratory of Precision Spectroscopy, Department of Physics,  
East China Normal University  
Shanghai 200062, P. R. China*

Corresponding Author E-mail: [htsun@phy.ecnu.edu.cn](mailto:htsun@phy.ecnu.edu.cn) ; [zrsun@phy.ecnu.edu.cn](mailto:zrsun@phy.ecnu.edu.cn)

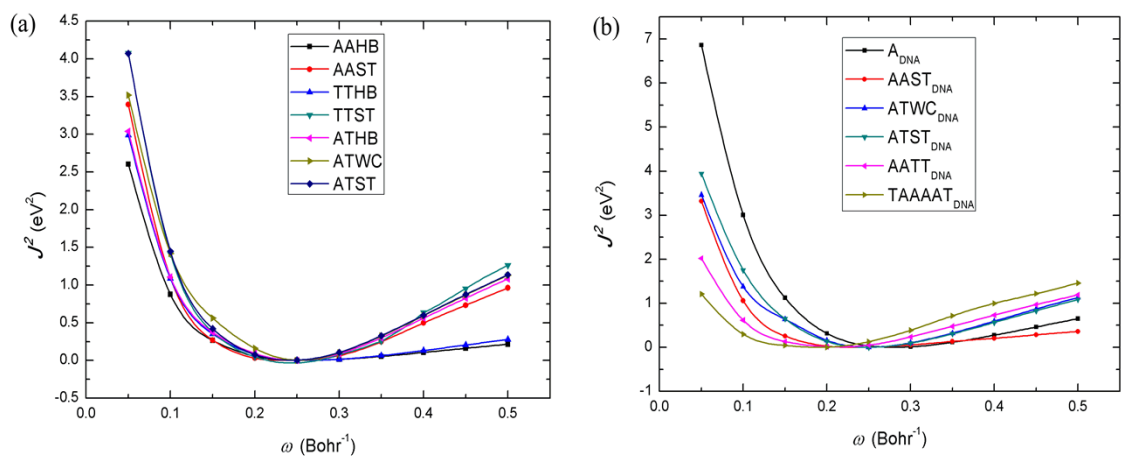

**Fig. S1**  $J^2$  as a functional of  $\omega$  for various isomers of NAB pairs and clusters as determined by LC- $\omega$ PBE functional and cc-pVTZ basis set.

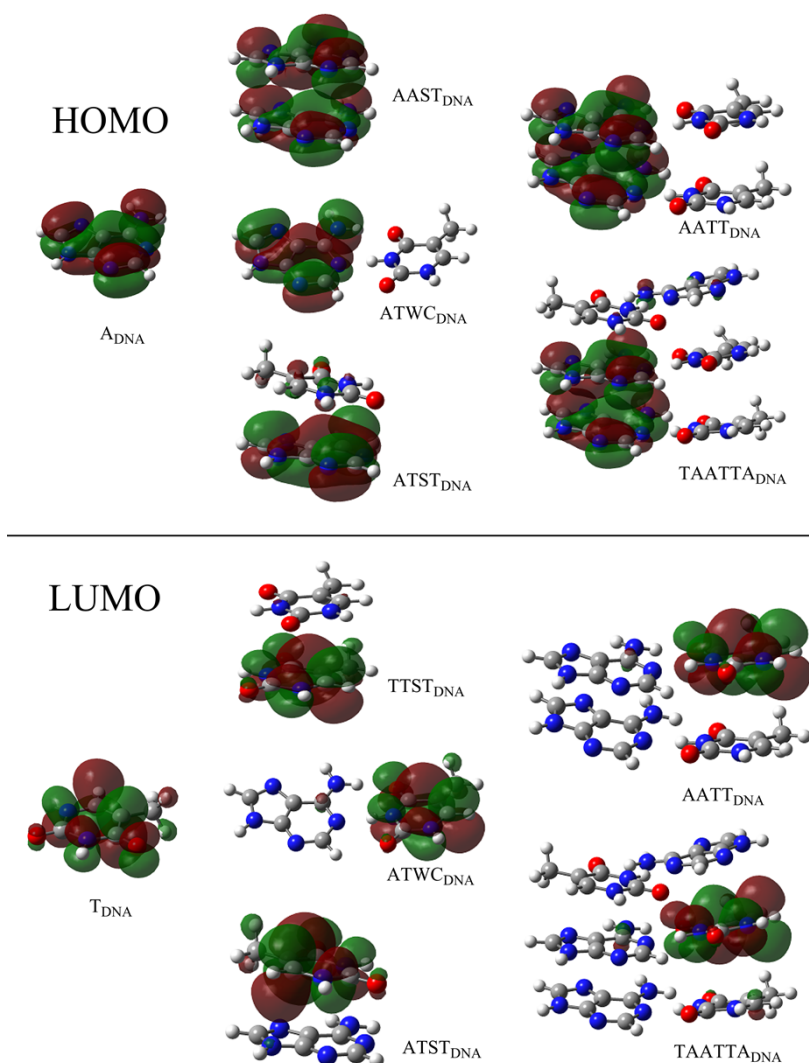

**Fig. S2** Frontier molecular orbitals (HOMO and LUMO) of various NAB pairs calculated using optimally tuned LC- $\omega$ PBE\*/cc-pVTZ.

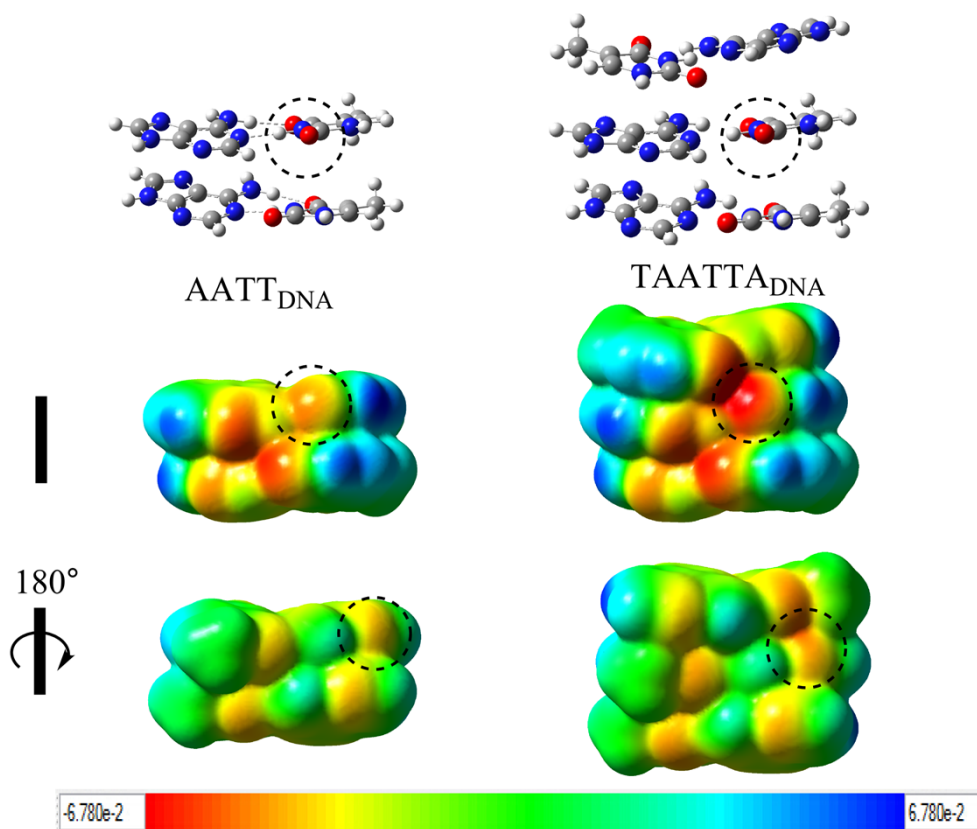

**Fig. S3** 3D plot of electrostatic potential (ESP) of AATT<sub>DNA</sub> and TAATTA<sub>DNA</sub>. Isovalues for surface: 0.0004 au. Red color represents rich in electrons; Blue color represents poor in electrons.

**Table S1.** Calculated Negative HOMO energy  $-\epsilon_{\text{HOMO}}$ , LUMO energy  $-\epsilon_{\text{LUMO}}$ , IP, EA, Orbital Energy Gap  $\Delta\epsilon$  and Fundamental Gap  $\Delta E_{\text{F}}$  for various isomers of NAB pairs.<sup>a</sup> All units are in eVs.

|                           | PBE   | B3LYP | M06-2X | LC- $\omega$ PBE | LC- $\omega$ PBE* | EOM-IP-CCSD/CCSD <sup>c</sup> |
|---------------------------|-------|-------|--------|------------------|-------------------|-------------------------------|
| TTHB                      |       |       |        |                  |                   |                               |
| $-\epsilon_{\text{HOMO}}$ | 5.93  | 6.83  | 8.22   | 9.52             | 8.83              |                               |
| IP                        | 7.87  | 8.29  | 8.94   | 9.25             | 8.83              | 8.88                          |
| $-\epsilon_{\text{LUMO}}$ | 2.11  | 1.43  | 0.39   | -0.99            | -0.58             |                               |
| EA                        | 0.19  | -0.01 | -0.34  | -0.74            | -0.58             | -0.62                         |
| $\Delta\epsilon$          | 3.82  | 5.4   | 7.83   | 10.51            | 9.41              |                               |
| $\Delta E_{\text{F}}$     | 7.68  | 8.3   | 9.28   | 9.99             | 9.41              |                               |
| TTST                      |       |       |        |                  |                   |                               |
| $-\epsilon_{\text{HOMO}}$ | 5.98  | 6.91  | 8.31   | 9.60             | 8.77              |                               |
| IP                        | 8.15  | 8.55  | 9.08   | 9.07             | 8.79              | 8.91                          |
| $-\epsilon_{\text{LUMO}}$ | 2.25  | 1.61  | 0.59   | -0.80            | -0.31             |                               |
| EA                        | 0.06  | -0.08 | -0.24  | -0.20            | -0.31             | -0.13                         |
| $\Delta\epsilon$          | 3.73  | 5.3   | 7.72   | 10.4             | 9.08              |                               |
| $\Delta E_{\text{F}}$     | 8.09  | 8.63  | 9.32   | 9.27             | 9.10              |                               |
| AAHB                      |       |       |        |                  |                   |                               |
| $-\epsilon_{\text{HOMO}}$ | 5.45  | 6.24  | 7.57   | 8.88             | 8.26              |                               |
| IP                        | 7.31  | 7.67  | 8.28   | 8.67             | 8.29              | 8.23                          |
| $-\epsilon_{\text{LUMO}}$ | 1.62  | 0.94  | -0.03  | -1.31            | -0.91             |                               |
| EA                        | -0.21 | -0.45 | -0.76  | -1.06            | -0.89             | -1.02                         |
| $\Delta\epsilon$          | 3.83  | 5.3   | 7.6    | 10.19            | 9.17              |                               |
| $\Delta E_{\text{F}}$     | 7.52  | 8.12  | 9.04   | 9.73             | 9.18              |                               |
| AAST                      |       |       |        |                  |                   |                               |
| $-\epsilon_{\text{HOMO}}$ | 5.44  | 6.24  | 7.56   | 8.85             | 8.09              |                               |
| IP                        | 7.52  | 7.81  | 8.31   | 8.36             | 8.07              | 8.16                          |
| $-\epsilon_{\text{LUMO}}$ | 1.65  | 0.98  | 0.02   | -1.27            | -0.77             |                               |
| EA                        | -0.35 | -0.54 | -0.75  | -0.97            | -0.75             | -0.37                         |
| $\Delta\epsilon$          | 3.79  | 5.26  | 7.54   | 10.12            | 8.8               |                               |
| $\Delta E_{\text{F}}$     | 7.87  | 8.35  | 9.06   | 9.33             | 8.82              |                               |
| ATHB                      |       |       |        |                  |                   |                               |
| $-\epsilon_{\text{HOMO}}$ | 5.59  | 6.38  | 7.70   | 9.01             | 8.33              |                               |
| IP                        | 7.59  | 7.69  | 8.53   | 8.52             | 8.36              | 8.36                          |
| $-\epsilon_{\text{LUMO}}$ | 1.97  | 1.31  | 0.28   | -1.09            | -0.62             |                               |
| EA                        | -0.01 | -0.22 | -0.50  | -0.50            | -0.59             | -0.64                         |

|                           |       |       |       |       |       |      |
|---------------------------|-------|-------|-------|-------|-------|------|
| $\Delta\epsilon$          | 3.62  | 5.07  | 7.42  | 10.1  | 8.95  |      |
| $\Delta E_F$              | 7.6   | 7.91  | 9.03  | 9.02  | 8.95  |      |
| AAST <sub>DNA</sub>       |       |       |       |       |       |      |
| $-\epsilon_{\text{HOMO}}$ | 5.13  | 5.92  | 7.20  | 8.51  | 7.73  |      |
| IP                        | 7.20  | 7.48  | 7.95  | 8.19  | 7.75  | 7.81 |
| $-\epsilon_{\text{LUMO}}$ | 1.46  | 0.79  | -0.16 | -1.47 | -0.94 |      |
| EA                        | -0.52 | -0.71 | -0.93 | -1.16 | -0.94 | -    |
| $\Delta\epsilon$          | 3.67  | 5.13  | 7.36  | 9.98  | 8.67  |      |
| $\Delta E_F$              | 7.72  | 8.19  | 8.88  | 9.35  | 8.69  |      |
| ATWC <sub>DNA</sub>       |       |       |       |       |       |      |
| $-\epsilon_{\text{HOMO}}$ | 5.29  | 6.08  | 7.41  | 8.72  | 8.10  |      |
| IP                        | 7.43  | 7.78  | 8.26  | 8.24  | 8.08  | 8.01 |
| $-\epsilon_{\text{LUMO}}$ | 1.88  | 1.21  | 0.17  | -1.21 | -0.77 |      |
| EA                        | -0.22 | -0.43 | -0.65 | -0.58 | -0.73 | -    |
| $\Delta\epsilon$          | 3.41  | 4.87  | 7.24  | 9.93  | 8.87  |      |
| $\Delta E_F$              | 7.65  | 8.21  | 8.91  | 8.82  | 8.81  |      |

<sup>a</sup> The orbital energies are calculated with cc-pVTZ basis set. <sup>b</sup> EOM-IP-CCSD values are calculated with 6-311+G(d,p) basis set, taken from references <sup>1,2</sup>. The CCSD values are calculated with aug-cc-pVDZ basis set in this work.

**Table S2.** Calculated reactivity descriptors of electrophilicity  $\omega$  and global hardness  $\eta$  of ATWC as a function of electric field strength along the  $x$  axis at different DFT levels with cc-pVTZ basis set. 1 au = 51.4 V/Å = 51.4 × 10<sup>10</sup> V/m.

| Electric Field            | PBE      | B3LYP    | M06-2X   | LC- $\omega$ PBE | LC- $\omega$ PBE* | CCSD/aug-cc-pVDZ |
|---------------------------|----------|----------|----------|------------------|-------------------|------------------|
| Electrophilicity $\omega$ |          |          |          |                  |                   |                  |
| 0                         | 3.892317 | 2.790302 | 2.011455 | 1.431144         | 1.532574          | 1.55556          |
| 0.002                     | 3.372748 | 2.503159 | 1.875767 | 1.389231         | 1.477171          |                  |
| 0.004                     | 3.83608  | 2.73505  | 2.035813 | 1.511649         | 1.592138          |                  |
| 0.006                     | 4.606101 | 3.086746 | 2.198064 | 1.596676         | 1.696216          |                  |
| 0.008                     | 5.801584 | 3.561146 | 2.399354 | 1.698015         | 1.821521          |                  |
| 0.01                      | 7.880507 | 4.22706  | 2.651969 | 1.819649         | 1.973575          |                  |
| -0.002                    | 4.668612 | 3.17799  | 2.201012 | 1.532253         | 1.652959          |                  |
| -0.004                    | 5.806465 | 3.682323 | 2.428199 | 1.648354         | 1.79229           |                  |
| -0.006                    | 7.627083 | 4.36355  | 2.703329 | 1.781508         | 1.954758          |                  |
| -0.008                    | 10.98543 | 5.329134 | 3.042326 | 1.935574         | 2.145654          |                  |
| -0.01                     | 19.07806 | 6.800683 | 3.469375 | 2.115468         | 2.373003          |                  |
| Global hardness $\eta$    |          |          |          |                  |                   |                  |
| 0                         | 1.64388  | 2.367855 | 3.544633 | 4.884415         | 4.31623           | 4.3333           |
| 0.002                     | 1.879125 | 2.61562  | 3.787911 | 5.09681          | 4.524814          |                  |

|        |          |          |          |          |          |
|--------|----------|----------|----------|----------|----------|
| 0.004  | 1.64837  | 2.448535 | 3.646275 | 4.943605 | 4.325894 |
| 0.006  | 1.369445 | 2.162945 | 3.358776 | 4.655019 | 4.042617 |
| 0.008  | 1.087255 | 1.87355  | 3.067198 | 4.362084 | 3.75539  |
| 0.01   | 0.80221  | 1.58075  | 2.772085 | 4.065608 | 3.465041 |
| -0.002 | 1.39094  | 2.10757  | 3.280816 | 4.620736 | 4.058671 |
| -0.004 | 1.13515  | 1.844565 | 3.013592 | 4.353241 | 3.797571 |
| -0.006 | 0.87745  | 1.578975 | 2.743785 | 4.083023 | 3.533751 |
| -0.008 | 0.618665 | 1.31162  | 2.471935 | 3.810497 | 3.267617 |
| -0.01  | 0.36178  | 1.0429   | 2.198185 | 3.535792 | 2.999172 |

### Geometry Details

For  $TTST_{DNA}$ ,  $AAST_{DNA}$ ,  $ATWC_{DNA}$ ,  $ATST_{DNA}$ ,  $AATT_{DNA}$  and  $TAATTA_{DNA}$  initial geometries are extracted from the original structure of the DNA 18-mer duplex from the X-ray DNA structure (PDB ID: 3BSE).<sup>3</sup> All the geometries are documented below. NABs from dA8, dA9, dT10, dA29, dT30, and dT31 were used for the hexmer model. The C1' sugar atoms covalently bound to the bases were replaced by hydrogens. The hydrogen atoms were added using the Gaussview software<sup>4</sup> and their positions were optimized at the  $\omega B97X-D/6-31+G(d,p)$  level. For ATWC and ATST, geometries are optimized at the RI-MP2/cc-pVTZ level, taken from reference<sup>5</sup>. For others, optimized geometries are obtained by the hybrid B3LYP-D<sup>6-8</sup> dispersion-corrected functional and the 6-31+G(d,p) basis set, taken from reference<sup>2</sup>.

### References

- (1) K. B. Bravaya, E. Epifanovsky and A. I. Krylov, *J. Phys. Chem. Lett.*, 2012, **3**, 2726-2732.
- (2) K. B. Bravaya, O. Kostko, M. Ahmed and A. I. Krylov, *Phys. Chem. Chem. Phys.*, 2010, **12**, 2292-2307.
- (3) N. Narayana and M. Weiss, *J. Mol. Biol.*, 2009, **385**, 469-490.
- (4) GaussView, Version 5, R. Dennington, T. Keith and J. Millam, *Semichem Inc.*, Shawnee Mission, KS, 2009.
- (5) J. Spöner, P. Jurecka and P. Hobza, *J. Am. Chem. Soc.*, 2004, **126**, 10142-10151.
- (6) A. D. Becke, *J. Chem. Phys.*, 1993, **98**, 5648-5652.
- (7) S. Grimme, *J. Comp. Chem.*, 2006, **27**, 1787-1799.
- (8) C. Lee, W. Yang and R. G. Parr, *Phys. Rev. B*, 1988, **37**, 785-789.

|   | $TAATTA_{DNA}$ |             |             |
|---|----------------|-------------|-------------|
| N | -4.66638436    | -2.92799422 | -2.04684916 |
| C | -4.24297532    | -2.41853218 | -3.25562225 |
| N | -2.93612022    | -2.37077318 | -3.38435726 |
| C | -2.46540919    | -2.87328722 | -2.17570517 |
| C | -1.16874409    | -3.08996624 | -1.67548113 |
| N | -0.05078300    | -2.83018622 | -2.35878018 |
| N | -1.05754808    | -3.59497927 | -0.42700103 |
| C | -2.17717616    | -3.86171029 | 0.26209702  |
| N | -3.44412526    | -3.70868828 | -0.09978501 |
| C | -3.52199127    | -3.20845525 | -1.34267910 |
| N | -4.88890037    | -0.14907001 | 0.83894506  |
| C | -5.19488740    | 0.25176502  | -0.44149003 |
| N | -4.14101331    | 0.41347503  | -1.21550709 |

|   |             |             |             |
|---|-------------|-------------|-------------|
| C | -3.06633523 | 0.10690901  | -0.38652703 |
| C | -1.66472013 | 0.06792301  | -0.60599605 |
| N | -1.08615108 | 0.34455603  | -1.76892514 |
| N | -0.87642807 | -0.28583702 | 0.42931703  |
| C | -1.45396011 | -0.58824104 | 1.59989512  |
| N | -2.74530721 | -0.59604304 | 1.92762015  |
| C | -3.50902527 | -0.23642302 | 0.88140307  |
| N | -3.01502223 | 2.69839921  | 3.04829823  |
| O | -1.75439713 | 2.68009020  | 2.50465819  |
| C | -0.76343506 | 2.38737818  | 3.14859424  |
| N | -1.69373913 | 3.02091323  | 1.17717609  |
| C | -2.74866121 | 3.37225126  | 0.35847403  |
| O | -2.54362220 | 3.63319628  | -0.82822507 |
| C | -4.05065131 | 3.39125026  | 1.00349508  |
| C | -5.25122040 | 3.78955529  | 0.20491302  |
| C | -4.11508431 | 3.05282023  | 2.29833017  |
| N | 4.84464837  | 3.78637329  | -0.95543507 |
| C | 4.63676835  | 3.85575630  | -2.31198718 |
| N | 3.38002626  | 3.73379329  | -2.66047820 |
| C | 2.71095721  | 3.57039527  | -1.45415411 |
| N | 1.35420710  | 3.40107726  | -1.14105709 |
| N | 0.38222403  | 3.36462826  | -2.05536716 |
| N | 1.02097208  | 3.26769125  | 0.16342001  |
| C | 1.99304615  | 3.29990425  | 1.08085008  |
| N | 3.30459025  | 3.45995026  | 0.91041807  |
| C | 3.60094828  | 3.59233528  | -0.39424603 |
| N | 3.95282630  | 0.10649801  | 1.45733211  |
| C | 2.57867420  | -0.02113600 | 1.50386211  |
| O | 1.94604915  | -0.09993301 | 2.54666819  |
| N | 1.96412215  | -0.05567000 | 0.27555902  |
| C | 2.57070120  | 0.00173200  | -0.96673107 |
| O | 1.87815614  | -0.01888400 | -1.99131915 |
| C | 4.01665131  | 0.09133301  | -0.94454907 |
| C | 4.76332936  | 0.10880501  | -2.24498817 |
| C | 4.62663936  | 0.15074101  | 0.25408402  |
| N | 2.47529619  | -3.64314628 | 2.92764722  |
| C | 1.28814510  | -3.62256728 | 2.23406917  |
| O | 0.20247602  | -3.62971028 | 2.78763821  |
| N | 1.41794311  | -3.58311127 | 0.87087407  |
| C | 2.59258920  | -3.54329327 | 0.14952401  |
| O | 2.55244019  | -3.50200327 | -1.07460008 |
| C | 3.80739929  | -3.54655527 | 0.94273207  |
| C | 5.13062739  | -3.49870427 | 0.24345802  |
| C | 3.68629728  | -3.59606528 | 2.27899618  |
| H | -4.94650738 | -2.08973216 | -4.00706331 |
| H | -2.00242515 | -4.23438732 | 1.26824310  |
| H | -6.21707347 | 0.41311503  | -0.75543206 |
| H | -0.75769606 | -0.85879906 | 2.38849518  |
| H | -6.17040548 | 3.65812928  | 0.78263406  |
| H | -5.31374642 | 3.19045924  | -0.70810805 |
| H | -5.18360840 | 4.83679637  | -0.10654601 |
| H | -5.05809538 | 3.03547723  | 2.83520122  |
| H | 5.45424642  | 4.00259731  | -3.00427623 |
| H | 1.64940813  | 3.15960424  | 2.10352916  |
| H | 4.40113133  | 0.92053407  | -2.88318622 |
| H | 4.60291335  | -0.82702806 | -2.78949121 |
| H | 5.83631943  | 0.23906502  | -2.07873616 |
| H | 5.70500642  | 0.23704702  | 0.33919203  |
| H | 5.18310440  | -2.62846120 | -0.41802803 |
| H | 5.27437140  | -4.38307934 | -0.38474403 |
| H | 5.95221544  | -3.44609026 | 0.96320107  |
| H | 4.55462635  | -3.59725227 | 2.93009322  |
| H | 0.86772107  | -3.00891223 | -1.95395015 |
| H | -0.11464801 | -2.37612618 | -3.25451725 |
| H | -5.61023744 | -3.03316223 | -1.71390013 |
| H | 2.40551218  | -3.59075327 | 3.93181330  |
| H | 0.50667904  | -3.59666227 | 0.35310903  |
| H | -5.51896141 | -0.37919903 | 1.58969712  |
| H | -0.07920001 | 0.22603202  | -1.88555114 |

|   |             |             |             |
|---|-------------|-------------|-------------|
| H | -1.66535212 | 0.54026404  | -2.56940819 |
| H | 0.92394207  | -0.14793501 | 0.31404602  |
| H | 4.42379834  | 0.23221802  | 2.33879918  |
| H | -0.73786205 | 3.04316623  | 0.77309006  |
| H | -3.09609224 | 2.36893318  | 3.99722130  |
| H | 5.71550244  | 3.86911030  | -0.45706003 |
| H | -0.59088904 | 3.34796525  | -1.75692114 |
| H | 0.61144505  | 3.48300827  | -3.02810823 |

|   |             |                           |             |
|---|-------------|---------------------------|-------------|
|   |             | <b>AATT<sub>DNA</sub></b> |             |
| N | 4.93337000  | 0.65260600                | -1.56810400 |
| C | 4.78240900  | -0.48255800               | -2.33525900 |
| N | 3.53139500  | -0.77436200               | -2.61294500 |
| C | 2.80818900  | 0.23018900                | -1.97851600 |
| C | 1.43037000  | 0.49916800                | -1.88876600 |
| N | 0.48446000  | -0.24185000               | -2.47214900 |
| N | 1.05046200  | 1.57749300                | -1.16835800 |
| C | 1.99663400  | 2.32765700                | -0.58384500 |
| N | 3.31499700  | 2.18202200                | -0.60062000 |
| C | 3.66095600  | 1.10606500                | -1.32433600 |
| C | 4.64895900  | -0.06203500               | 2.36990500  |
| N | 5.22267500  | -1.04395400               | 1.59498300  |
| N | 4.35491500  | -1.74365700               | 0.89267400  |
| C | 3.12439700  | -1.19145400               | 1.23455000  |
| C | 1.79655600  | -1.47353500               | 0.81991200  |
| N | 1.47708500  | -2.41216200               | -0.06348200 |
| N | 0.80270100  | -0.73041500               | 1.34737600  |
| C | 1.11889900  | 0.23385100                | 2.22223200  |
| N | 2.31505400  | 0.59784600                | 2.68232600  |
| C | 3.28749400  | -0.15934600               | 2.14541000  |
| N | -4.11986500 | -1.17512200               | 1.66880600  |
| C | -2.78898100 | -0.85207900               | 1.84501300  |
| O | -2.38578200 | -0.13425900               | 2.74839000  |
| N | -1.93784500 | -1.40098200               | 0.91673100  |
| C | -2.27558200 | -2.20519600               | -0.15744400 |
| O | -1.38920300 | -2.64481700               | -0.89967100 |
| C | -3.69182400 | -2.47007900               | -0.30935000 |
| C | -4.15614000 | -3.29099500               | -1.47558100 |
| C | -4.53193700 | -1.95531800               | 0.60775600  |
| N | -3.09314700 | 2.93703100                | 1.00393900  |
| C | -1.78928400 | 2.71104100                | 0.63031600  |
| O | -0.84048300 | 3.16806200                | 1.24356300  |
| N | -1.63637300 | 1.92310500                | -0.47983500 |
| C | -2.63698000 | 1.33634700                | -1.22564700 |
| O | -2.34614400 | 0.64597700                | -2.19558200 |
| C | -3.98776600 | 1.59900400                | -0.76621700 |
| C | -5.13791500 | 0.99543700                | -1.51116200 |
| C | -4.14394300 | 2.37821500                | 0.31618200  |
| H | 5.63407700  | -1.06440600               | -2.65724200 |
| H | 0.74651400  | -1.08215200               | -2.95974200 |
| H | -0.50193400 | 0.00278700                | -2.39161200 |
| H | 1.60821600  | 3.15529900                | 0.00439300  |
| H | 6.29145500  | -1.20703700               | 1.58625600  |
| H | 2.21667200  | -2.88123400               | -0.56188300 |
| H | 0.51924300  | -2.48570700               | -0.40627500 |
| H | 0.26971600  | 0.79624700                | 2.60119000  |
| H | -0.93059200 | -1.14801000               | 1.04726800  |
| H | -5.24081900 | -3.42455400               | -1.45520600 |
| H | -3.68001800 | -4.27544500               | -1.47072500 |
| H | -3.87850500 | -2.80417500               | -2.41539000 |
| H | -5.60238600 | -2.12574500               | 0.55570200  |
| H | -0.63909300 | 1.78127900                | -0.77103000 |
| H | -6.09006500 | 1.24733900                | -1.03612200 |
| H | -5.04083300 | -0.09392000               | -1.55130600 |
| H | -5.16188500 | 1.34846600                | -2.54652200 |
| H | -5.12695100 | 2.61208100                | 0.71251100  |
| H | 5.78541300  | 1.05017500                | -1.20912900 |
| H | 5.10105100  | 0.60147900                | 2.97797000  |
| H | -4.76986400 | -0.80313500               | 2.34271200  |



|   |             |                                      |             |
|---|-------------|--------------------------------------|-------------|
| H | -3.22905200 | 3.45926300                           | 1.85544500  |
|   |             | <b>ATWC<sub>DNA</sub></b>            |             |
| N | -4.94483308 | 0.52486182                           | -0.04366884 |
| C | -5.16714919 | -0.80682353                          | -0.32134143 |
| N | -4.07314581 | -1.53470249                          | -0.34668326 |
| C | -3.06041484 | -0.62017902                          | -0.07710224 |
| C | -1.66500124 | -0.75298465                          | 0.04110328  |
| N | -1.01042280 | -1.90997997                          | -0.08958039 |
| N | -0.95186792 | 0.36380260                           | 0.30629913  |
| C | -1.60469237 | 1.52778157                           | 0.44274013  |
| N | -2.90492336 | 1.77746814                           | 0.36132102  |
| C | -3.58555319 | 0.65074243                           | 0.09984419  |
| N | 3.71243232  | 1.64652532                           | -0.27304850 |
| C | 2.34290128  | 1.59210783                           | -0.16282705 |
| O | 1.63553900  | 2.58007757                           | -0.25619411 |
| N | 1.83135955  | 0.33925205                           | 0.05009791  |
| C | 2.53806812  | -0.84130081                          | 0.14279367  |
| O | 1.93945985  | -1.89441903                          | 0.32874876  |
| C | 3.97616586  | -0.71585322                          | -0.00152196 |
| C | 4.82363270  | -1.94778945                          | 0.07728493  |
| C | 4.48389059  | 0.51111098                           | -0.20133184 |
| H | -6.16154674 | -1.18731423                          | -0.50562339 |
| H | -1.51947304 | -2.73857972                          | -0.34807217 |
| H | 0.00185245  | -1.95890375                          | 0.02092977  |
| H | -0.95749747 | 2.38295066                           | 0.62081019  |
| H | 0.78890592  | 0.31469019                           | 0.16039163  |
| H | 5.87901123  | -1.71025489                          | -0.08228231 |
| H | 4.50915799  | -2.67949071                          | -0.67335099 |
| H | 4.72001549  | -2.43215337                          | 1.05290278  |
| H | 5.55053598  | 0.67382923                           | -0.31908386 |
| H | -5.61884732 | 1.27114249                           | -0.00277834 |
| H | 4.10661602  | 2.54735088                           | -0.49528994 |
|   |             | <b>AAS<sub>T</sub><sub>DNA</sub></b> |             |
| N | 4.93337200  | -0.65240100                          | 1.56796300  |
| C | 4.78240000  | 0.48276100                           | 2.33511800  |
| N | 3.53138400  | 0.77455300                           | 2.61280400  |
| C | 2.80818700  | -0.23000500                          | 1.97837500  |
| C | 1.43037100  | -0.49899700                          | 1.88862500  |
| N | 0.48445400  | 0.24201200                           | 2.47200800  |
| N | 1.05047300  | -1.57732500                          | 1.16821700  |
| C | 1.99665200  | -2.32748000                          | 0.58370400  |
| N | 3.31501400  | -2.18183300                          | 0.60047900  |
| C | 3.66096300  | -1.10587200                          | 1.32419500  |
| N | 4.64895400  | 0.06223700                           | -2.37004600 |
| C | 5.22266100  | 1.04416100                           | -1.59512400 |
| N | 4.35489400  | 1.74385600                           | -0.89281500 |
| C | 3.12438200  | 1.19164100                           | -1.23469100 |
| C | 1.79653800  | 1.47371000                           | -0.82005300 |
| N | 1.47705800  | 2.41233400                           | 0.06334100  |
| N | 0.80269000  | 0.73058000                           | -1.34751700 |
| C | 1.11889700  | -0.23368300                          | -2.22237290 |
| N | 2.31505600  | -0.59766600                          | -2.68246700 |
| C | 3.28748900  | 0.15953500                           | -2.14555100 |
| H | 5.63406300  | 1.06461700                           | 2.65710100  |
| H | 0.74650000  | 1.08231700                           | 2.95960100  |
| H | -0.50193800 | -0.00263400                          | 2.39147100  |
| H | 1.60824200  | -3.15512600                          | -0.00453400 |
| H | 6.29144000  | 1.20725500                           | -1.58639700 |
| H | 2.21664100  | 2.88141300                           | 0.56174200  |
| H | 0.51921500  | 2.48587000                           | 0.40613400  |
| H | 0.26972000  | -0.79608700                          | -2.60133100 |
| H | 5.78541900  | -1.04996200                          | 1.20898800  |
| H | 5.10105300  | -0.60127300                          | -2.97811100 |
|   |             | <b>ATST<sub>DNA</sub></b>            |             |
| N | 0.88073981  | 1.53141505                           | -1.89001719 |
| C | 1.02746884  | 2.51306250                           | -0.93678599 |

|   |             |             |             |
|---|-------------|-------------|-------------|
| N | 1.48501423  | 2.07133484  | 0.21709095  |
| C | 1.64239914  | 0.70386279  | 0.01368529  |
| C | 2.11178487  | -0.34349651 | 0.84850682  |
| N | 2.52742622  | -0.16916359 | 2.09771550  |
| N | 2.14941209  | -1.58888401 | 0.33273759  |
| C | 1.75288987  | -1.76959539 | -0.93428966 |
| N | 1.30262457  | -0.87612203 | -1.81406713 |
| C | 1.27069968  | 0.35512608  | -1.27539202 |
| N | -2.10349667 | -1.10505884 | -1.08747144 |
| C | -1.54253007 | -1.85507549 | -0.08355568 |
| O | -1.33542164 | -3.05002171 | -0.19102383 |
| N | -1.23458644 | -1.15562402 | 1.05573657  |
| C | -1.43041136 | 0.19197695  | 1.28420167  |
| O | -1.08093028 | 0.68953378  | 2.35597040  |
| C | -2.04684199 | 0.92048852  | 0.18835702  |
| C | -2.32731343 | 2.38055991  | 0.35350439  |
| C | -2.34331284 | 0.24232190  | -0.92854920 |
| H | 0.78018387  | 3.54523283  | -1.14398724 |
| H | 1.80564525  | -2.79801584 | -1.27989578 |
| H | -2.69158511 | 2.82007104  | -0.57927195 |
| H | -1.42092283 | 2.90658503  | 0.66685194  |
| H | -3.07745546 | 2.54875958  | 1.13279111  |
| H | -2.79377365 | 0.72993733  | -1.78710463 |
| H | 0.59495122  | 1.62981525  | -2.85033340 |
| H | 2.92463900  | -0.94880913 | 2.62304861  |
| H | 2.57284482  | 0.76463095  | 2.47256684  |
| H | -0.84403480 | -1.72700591 | 1.82934748  |
| H | -2.25860980 | -1.57796698 | -1.96375508 |

#### ATWC

|   |            |            |            |
|---|------------|------------|------------|
| N | -4.1463095 | 0.0276066  | 0.4989510  |
| C | -4.1783269 | 0.0241149  | 1.8693855  |
| C | -3.0503934 | 0.0075345  | 2.6143561  |
| C | -1.7764463 | -0.0075165 | 1.9134149  |
| N | -1.8409343 | -0.0044729 | 0.5342848  |
| C | -2.9776615 | 0.0158134  | -0.2412098 |
| C | -3.0337782 | 0.0039661  | 4.1067561  |
| O | -0.6903188 | -0.0223257 | 2.4988523  |
| O | -2.9710806 | 0.0231200  | -1.4594154 |
| N | 0.6342733  | -0.0396251 | -0.8445604 |
| C | 1.8085815  | -0.0725030 | -0.1925510 |
| C | 2.9816390  | -0.0450617 | -0.9713088 |
| C | 2.8096988  | 0.0150597  | -2.3538115 |
| N | 1.6523629  | 0.0464189  | -3.0268028 |
| C | 0.6173449  | 0.0155645  | -2.1932329 |
| N | 4.3110053  | -0.0631092 | -0.6210230 |
| C | 4.9362856  | -0.0138224 | -1.7844380 |
| N | 4.0874208  | 0.0345553  | -2.8553711 |
| N | 1.8292763  | -0.1390909 | 1.1445440  |
| H | -0.3707005 | 0.0368460  | -2.6349270 |
| H | 6.0061912  | -0.0105896 | -1.9082208 |
| H | 4.3375082  | 0.0791089  | -3.8297046 |
| H | 0.9607282  | -0.0976204 | 1.6743842  |
| H | 2.7192948  | -0.1141775 | 1.6075837  |
| H | -4.9945252 | 0.0435817  | -0.0428232 |
| H | -0.9349425 | -0.0189830 | 0.0123682  |
| H | -5.1632478 | 0.0355348  | 2.3150232  |
| H | -2.5162678 | -0.8784794 | 4.4795452  |
| H | -2.4928573 | 0.8705738  | 4.4831417  |
| H | -4.0449522 | 0.0166200  | 4.5078085  |

#### ATST

|   |            |            |            |
|---|------------|------------|------------|
| N | 0.2793014  | 2.4068393  | -0.6057517 |
| C | -1.0848570 | 2.4457461  | -0.5511608 |
| H | -1.6594403 | 3.0230294  | -1.2560905 |
| N | -1.5977117 | 1.7179877  | 0.4287543  |
| C | -0.4897255 | 1.1714358  | 1.0301910  |
| C | -0.3461366 | 0.2914710  | 2.1172343  |
| N | -1.4187090 | -0.1677767 | 2.8101441  |

|   |            |            |            |
|---|------------|------------|------------|
| H | -1.2388750 | -0.9594802 | 3.4047578  |
| H | -2.2918734 | -0.1788223 | 2.3073619  |
| N | 0.8857630  | -0.0700763 | 2.4919494  |
| C | 1.9352348  | 0.4072878  | 1.7968022  |
| H | 2.9060330  | 0.0788414  | 2.1458181  |
| N | 1.9409775  | 1.2242019  | 0.7402202  |
| C | 0.6952186  | 1.5779858  | 0.4063984  |
| H | 0.8610073  | 2.8298045  | -1.3104502 |
| N | 1.2754606  | -0.6478993 | -1.9779104 |
| C | 1.4130533  | -1.5536850 | -0.9550667 |
| H | 2.4258769  | -1.8670780 | -0.7468778 |
| C | 0.3575976  | -2.0239499 | -0.2530575 |
| C | 0.4821292  | -3.0179494 | 0.8521221  |
| H | 0.1757705  | -2.5756065 | 1.7986281  |
| H | -0.1601691 | -3.8770412 | 0.6639498  |
| H | 1.5112443  | -3.3572767 | 0.9513659  |
| C | -0.9684711 | -1.5298112 | -0.5939792 |
| O | -2.0029280 | -1.8396957 | -0.0199453 |
| N | -0.9956916 | -0.6383870 | -1.6720420 |
| H | -1.9014057 | -0.2501720 | -1.8985760 |
| C | 0.0684702  | -0.1191762 | -2.3763759 |
| O | -0.0397875 | 0.7227006  | -3.2531083 |
| H | 2.0853289  | -0.2760176 | -2.4454577 |

#### ATHB

|   |           |           |           |
|---|-----------|-----------|-----------|
| H | 5.990680  | 0.261936  | 0.007501  |
| H | 5.818471  | 2.006005  | 0.007529  |
| N | 5.408496  | 1.085033  | 0.009942  |
| C | 4.063858  | 0.957723  | 0.006878  |
| N | 3.916164  | -1.595541 | 0.005675  |
| N | 3.302013  | 2.071889  | 0.005763  |
| C | 3.430653  | -0.302343 | 0.005408  |
| C | 2.827886  | -2.337474 | 0.003632  |
| H | 2.815707  | -3.419133 | 0.003179  |
| C | 1.969674  | 1.936226  | 0.003504  |
| C | 2.031727  | -0.293949 | 0.003158  |
| H | 1.402969  | 2.864153  | 0.002647  |
| N | 1.658956  | -1.610112 | 0.002120  |
| N | 1.250614  | 0.805001  | 0.002169  |
| H | 0.680973  | -1.938493 | -0.000302 |
| H | -0.528210 | 0.451838  | 0.000450  |
| O | -1.091749 | -2.045098 | -0.004659 |
| N | -1.543977 | 0.213925  | 0.004308  |
| C | -1.902639 | -1.109138 | 0.002315  |
| H | -2.051103 | 2.230064  | 0.012779  |
| C | -2.474534 | 1.230957  | 0.012025  |
| H | -5.480364 | 2.043824  | 0.907311  |
| N | -3.263880 | -1.330159 | 0.008941  |
| H | -3.558801 | -2.300286 | 0.007696  |
| C | -3.814118 | 1.020988  | 0.018347  |
| C | -4.290346 | -0.362473 | 0.017006  |
| H | -4.344720 | 3.103667  | 0.029706  |
| C | -4.832907 | 2.123496  | 0.026392  |
| O | -5.464084 | -0.713025 | 0.022360  |
| H | -5.485207 | 2.052483  | -0.851747 |

#### AAHB

|   |           |           |          |
|---|-----------|-----------|----------|
| H | 6.306448  | 0.877476  | 0.000000 |
| H | 2.349822  | 3.024994  | 0.000000 |
| N | 3.925667  | 1.700061  | 0.000000 |
| C | 2.613107  | 1.970068  | 0.000000 |
| N | 5.636908  | 0.123873  | 0.000000 |
| H | 5.942501  | -0.836834 | 0.000000 |
| C | 4.316045  | 0.408860  | 0.000000 |
| H | -1.820123 | 3.393478  | 0.000000 |
| N | 1.588242  | 1.107244  | 0.000000 |
| C | -2.152511 | 2.363801  | 0.000000 |
| H | -0.208865 | 1.373792  | 0.000000 |
| C | 3.333710  | -0.602690 | 0.000000 |

|   |           |           |          |
|---|-----------|-----------|----------|
| C | 2.000326  | -0.177295 | 0.000000 |
| N | -1.250714 | 1.323859  | 0.000000 |
| N | -3.413164 | 1.981441  | 0.000000 |
| N | 3.413164  | -1.981441 | 0.000000 |
| C | -2.000326 | 0.177295  | 0.000000 |
| N | 1.250714  | -1.323859 | 0.000000 |
| C | -3.333710 | 0.602690  | 0.000000 |
| C | 2.152511  | -2.363801 | 0.000000 |
| H | -5.942501 | 0.836834  | 0.000000 |
| H | 0.208865  | -1.373792 | 0.000000 |
| N | -1.588242 | -1.107244 | 0.000000 |
| C | -4.316045 | -0.408860 | 0.000000 |
| H | 1.820123  | -3.393478 | 0.000000 |
| N | -5.636908 | -0.123873 | 0.000000 |
| C | -2.613107 | -1.970068 | 0.000000 |
| H | -6.306448 | -0.877476 | 0.000000 |
| N | -3.925667 | -1.700061 | 0.000000 |
| H | -2.349822 | -3.024994 | 0.000000 |

**AAST**

|   |           |           |           |
|---|-----------|-----------|-----------|
| H | -2.834372 | -2.827774 | -0.095099 |
| C | -2.421533 | -1.857494 | 0.171482  |
| H | 0.442668  | -2.516571 | -2.043933 |
| N | -1.323100 | -1.891033 | 0.943320  |
| N | -3.065728 | -0.790733 | -0.316879 |
| H | -0.928707 | -0.561356 | -2.960494 |
| N | 0.614423  | -1.544828 | -1.830351 |
| C | -0.107607 | -0.452301 | -2.265103 |
| C | -0.761276 | -0.726192 | 1.321946  |
| H | 0.839972  | -1.641867 | 2.144645  |
| C | -2.482886 | 0.349426  | 0.075717  |
| N | 2.475946  | -1.759533 | -0.259924 |
| C | 1.554458  | -1.071273 | -0.946647 |
| N | 0.344779  | -0.761835 | 2.105687  |
| C | -1.354948 | 0.480375  | 0.893590  |
| H | -3.595994 | 1.913570  | -0.847909 |
| N | -2.829181 | 1.640046  | -0.251020 |
| N | 0.295696  | 0.680578  | -1.739903 |
| C | 1.338274  | 0.311867  | -0.906540 |
| H | 0.898484  | 0.078440  | 2.187841  |
| C | 3.209461  | -0.955007 | 0.515907  |
| H | 3.992645  | -1.434327 | 1.098545  |
| N | -1.009173 | 1.811920  | 1.058031  |
| C | -1.910075 | 2.463900  | 0.360341  |
| N | 3.094086  | 0.374890  | 0.687700  |
| C | 2.152899  | 1.037196  | -0.012626 |
| H | -1.960350 | 3.539627  | 0.255504  |
| H | 1.089813  | 2.746140  | -0.001399 |
| N | 2.018292  | 2.379496  | 0.164606  |
| H | 2.508140  | 2.761539  | 0.962679  |

**TTHB**

|   |           |           |           |
|---|-----------|-----------|-----------|
| H | 3.130831  | 2.438223  | 0.000000  |
| H | -2.708747 | 2.322662  | 0.000000  |
| H | -5.148886 | 2.638728  | 0.000000  |
| H | -6.009205 | 1.347009  | 0.879542  |
| O | 5.350666  | 1.332647  | 0.000000  |
| N | 3.067800  | 1.426206  | 0.000000  |
| O | 0.784875  | 1.608956  | 0.000000  |
| C | -5.394886 | 1.572015  | 0.000000  |
| C | -2.893721 | 1.253796  | 0.000000  |
| H | -0.818910 | 0.915296  | 0.000000  |
| C | 4.290942  | 0.719485  | 0.000000  |
| C | 1.798611  | 0.893983  | 0.000000  |
| H | -6.009205 | 1.347009  | -0.879542 |
| C | -4.147361 | 0.737321  | 0.000000  |
| N | -1.755734 | 0.474501  | 0.000000  |
| N | 1.755734  | -0.474501 | 0.000000  |
| C | 4.147361  | -0.737321 | 0.000000  |

|   |           |           |           |
|---|-----------|-----------|-----------|
| H | 6.009205  | -1.347009 | -0.879542 |
| C | -1.798611 | -0.893983 | 0.000000  |
| C | -4.290942 | -0.719485 | 0.000000  |
| H | 0.818910  | -0.915296 | 0.000000  |
| C | 2.893721  | -1.253796 | 0.000000  |
| C | 5.394886  | -1.572015 | 0.000000  |
| O | -0.784875 | -1.608956 | 0.000000  |
| N | -3.067800 | -1.426206 | 0.000000  |
| O | -5.350666 | -1.332647 | 0.000000  |
| H | 6.009205  | -1.347009 | 0.879542  |
| H | 5.148886  | -2.638728 | 0.000000  |
| H | 2.708747  | -2.322662 | 0.000000  |
| H | -3.130831 | -2.438223 | 0.000000  |

#### TTST

|   |           |           |           |
|---|-----------|-----------|-----------|
| C | -0.680221 | 1.774938  | -0.220433 |
| C | -0.909771 | 1.428567  | 1.185427  |
| C | -1.687305 | 0.354917  | 1.461178  |
| N | -2.291157 | -0.398883 | 0.477311  |
| C | -2.078218 | -0.187653 | -0.876689 |
| H | -2.686138 | -1.300805 | 0.710897  |
| N | -1.350902 | 0.958864  | -1.147564 |
| O | 0.041940  | 2.687894  | -0.606706 |
| O | -2.477344 | -0.959153 | -1.737834 |
| H | -1.093075 | 1.085521  | -2.121737 |
| H | -1.874649 | 0.019738  | 2.475335  |
| C | -0.226996 | 2.251180  | 2.237770  |
| H | -0.513311 | 1.917253  | 3.240710  |
| H | -0.481919 | 3.311161  | 2.128313  |
| H | 0.862999  | 2.178698  | 2.134214  |
| H | 3.557202  | 0.755276  | -1.768558 |
| C | 2.178382  | -0.009343 | -0.312703 |
| C | 1.229646  | -0.683299 | -1.206033 |
| C | 2.209109  | -0.389927 | 0.985345  |
| C | 3.015807  | 1.097282  | -0.879976 |
| C | 0.383529  | -1.991315 | 0.751868  |
| N | 1.368320  | -1.362854 | 1.496083  |
| N | 0.421519  | -1.660194 | -0.588812 |
| O | 1.090837  | -0.439030 | -2.397053 |
| O | -0.440978 | -2.752638 | 1.244920  |
| H | 1.379151  | -1.592362 | 2.479478  |
| H | 2.885548  | 0.060402  | 1.703687  |
| H | -0.295345 | -2.081241 | -1.174661 |
| H | 3.732447  | 1.462516  | -0.136944 |
| H | 2.366338  | 1.926515  | -1.185291 |
